# Supplementary material for: Somatic complaints as a mediator in the association between body mass index and quality of life in children and adolescents
Source: PubMed Central journal article supplement (PMC8555287; doi:10.1186/s12875-021-01562-1), 2021-10-28
Supplement: 12875_2021_1562_MOESM1_ESM.pdf [file 12875_2021_1562_MOESM1_ESM.pdf]

Somatic complaints as a mediator in the association between body mass index and Quality of Life in children and adolescents.

Hevy Hassan- MSc1, Winifred D Paulis- PhD.1, Patrick JE Bindels- Prof. PhD1. , Bart W Koes- Prof. PhD.1, Marienke van Middelkoop- PhD1.

Author affiliation

1. Department of General Practice, Erasmus MC University Medical Center, PO Box 2040, 3000 CA,, Rotterdam, The Netherlands.

Correspondence to Mrs. H Hassan.

Department of General Practice, Erasmus MC University Medical Center, Room Na-1923, PO Box 2040, 3000 CA,, Rotterdam, The Netherlands. E-mail: [h.hassan@erasmusmc.nl](mailto:h.hassan@erasmusmc.nl)

| Supplementary 1 – Associations with Quality of Life in children aged 2-9 years old (DOERAK study 2010-2013) |            |              |         |              |              |         |
|-------------------------------------------------------------------------------------------------------------|------------|--------------|---------|--------------|--------------|---------|
|                                                                                                             | Univariate |              |         | Multivariate |              |         |
|                                                                                                             | B          | 95% CI       | P value | B            | 95% CI       | P value |
| Age (years)                                                                                                 | -0.89      | 1.36, -0.42  | <0.001* | -0.53        | -1.04, -0.03 | 0.04*   |
| SES, (Low (<2000 euros))                                                                                    | -5.61      | -8.27, -2.94 | <0.001* | -4.43        | -7.48, -1.38 | 0.005*  |
| Education (Low (MBO))                                                                                       | -3.64      | -5.76, -1.51 | 0.001*  | -2.04        | -4.21, 0.13  | 0.07    |
| Ethnicity (At least one parent born in another country)                                                     | -2.13      | -5.28, 1.01  | 0.18    | -2.04        | -4.21, 0.13  | 0.71    |
| Marital status (Parents separated)                                                                          | -3.78      | -7.00, -0.56 | 0.02*   | 0.86         | -2.58, 4.29  | 0.63    |
| BMIz score at baseline                                                                                      | -0.91      | -1.73, -0.09 | 0.03*   | -0.64        | -1.42, 0.14  | 0.11    |
| BMI mothers at baseline                                                                                     | -0.14      | -0.39, 0.10  | 0.25    | 0.04         | -0.20, 0.28  | 0.73    |
| Somatic complaints                                                                                          | -1.19      | -1.38, 1.01  | <0.001* | -1.04        | -1.26, -0.83 | <0.001* |
| Number of GP consultations                                                                                  | -0.02      | -0.38, 0.33  | 0.90    | 0.13         | -0.36, 0.62  | 0.59    |
| ICPC A: General and unspecified                                                                             | 1.14       | -1.61, 3.88  | 0.42    | 0.78         | -1.86, 3.42  | 0.56    |
| ICPC D: Digestive                                                                                           | 0.95       | -1.49, 3.39  | 0.44    | 2.96         | 0.46, 5.47   | 0.02*   |
| ICPC L: Musculoskeletal                                                                                     | -3.88      | -7.13, -0.63 | 0.02*   | -2.51        | -5.74, 0.72  | 0.13    |
| ICPC R: Respiratory                                                                                         | 0.25       | -1.90, 2.40  | 0.82    | -0.74        | -3.08, 1.59  | 0.53    |
| ICPC S: Skin                                                                                                | 0.94       | -1.20, 3.09  | 0.39    | -0.29        | -2.54, 1.96  | 0.80    |
| ICPC H: Ear                                                                                                 | -2.63      | -5.04, -0.22 | 0.03*   | -1.58        | -4.18, 1.01  | 0.23    |
| ICPC Other                                                                                                  | 0.01       | -2.25, 2.27  | 0.99    | -1.14        | -3.41, 1.13  | 0.33    |
| ICPC Not coded                                                                                              | -3.00      | -5.21, -0.79 | 0.08*   | -1.44        | -3.88, 1.00  | 0.25    |

\*P<0.05

| Supplementary 2 – Associations with Quality of Life in adolescents aged 10-18 years old (DOERAK study 2010-2013) |            |              |         |              |              |         |
|------------------------------------------------------------------------------------------------------------------|------------|--------------|---------|--------------|--------------|---------|
|                                                                                                                  | Univariate |              |         | Multivariate |              |         |
|                                                                                                                  | B          | 95% CI       | P value | B            | 95% CI       | P value |
| Age (years)                                                                                                      | 0.24       | -0.54, 1.02  | 0.55    | 1.65         | 0.95, 2.36   | <0.001* |
| SES, (Low (<2000 euros))                                                                                         | -2.18      | -6.48, 2.12  | 0.32    | -0.77        | -4.93, -3.39 | 0.72    |
| Education (Low (MBO))                                                                                            | -2.58      | -6.27, 1.10  | 0.17    | 0.30         | -2.98, 3.60  | 0.86    |
| Ethnicity (At least one parent born in another country)                                                          | 1.87       | -2.96, 6.70  | 0.45    | 1.73         | -2.47, 5.93  | 0.42    |
| Marital status (Parents separated)                                                                               | -1.66      | -5.74, 2.42  | 0.42    | -0.48        | -4.30, 3.35  | 0.81    |
| BMIz score at baseline                                                                                           | -2.38      | -3.61, -1.16 | <0.001* | -1.81        | -2.93, -0.92 | 0.002*  |
| BMI mothers at baseline                                                                                          | -0.40      | -0.76, -0.30 | 0.03*   | -0.06        | -0.42, 0.30  | 0.74    |
| Somatic complaints                                                                                               | -1.23      | -1.44, -1.03 | <0.001* | -1.41        | -1.67, -1.15 | <0.001* |
| Number of GP consultations                                                                                       | -0.63      | -1.27, 0.02  | 0.06    | 0.42         | -0.47, 1.31  | 0.35    |
| ICPC A: General and unspecified                                                                                  | -3.11      | -8.16, 1.95  | 0.23    | -2.56        | -7.28, 2.15  | 0.29    |
| ICPC D: Digestive                                                                                                | -4.05      | -8.57, 0.47  | 0.08    | -1.33        | -5.51, 2.85  | 0.53    |
| ICPC L: Musculoskeletal                                                                                          | 1.05       | -2.41, 4.51  | 0.55    | -0.42        | -3.92, 0.69  | 0.81    |
| ICPC R: Respiratory                                                                                              | 1.15       | -2.63, 4.93  | 0.55    | 2.99         | -0.61, 6.59  | 0.10    |
| ICPC S: Skin                                                                                                     | 0.61       | -2.75, 3.97  | 0.71    | -0.49        | -3.69, 2.72  | 0.77    |
| ICPC H: Ear                                                                                                      | 0.04       | -4.74, 4.83  | 0.99    | -3.62        | -7.92, 0.69  | 0.10    |
| ICPC Other                                                                                                       | -4.82      | -8.16, -1.47 | 0.01*   | -0.94        | -4.33, 2.44  | 0.58    |
| ICPC Not coded                                                                                                   | -1.92      | -5.52, 1.68  | 0.29    | -1.61        | -5.18, 1.97  | 0.38    |

\*p<0.05
